# Supplementary material
Source: publisher figshare collection journal article supplement (https://acs.figshare.com/ndownloader/files/23758310)
Supplement: Supplementary file 1 [file 23758310]

## Supporting Information

### **The orphan G-protein coupled receptor 182 is a negative regulator of definitive hematopoiesis through leukotriene B4 signaling**

Hyoun-Bum Kwon<sup>1,2</sup>, Duncan I. Mackie<sup>2</sup>, Remy Bonnavion<sup>3</sup>, Alan Le Mercier<sup>3</sup>, Christian S.M. Helker<sup>1,4</sup>, Taekwon Son<sup>5</sup>, Stefan Guenter<sup>6</sup>, D. Stephen Serafin<sup>2</sup>, Kyu-Won Kim<sup>5</sup>, Stefan Offermanns<sup>3</sup>, Kathleen M. Caron<sup>2\*</sup> and Didier Y.R. Stainier<sup>1\*</sup>

#### **Address**

<sup>1</sup> Department of Developmental Genetics, Max Planck Institute for Heart and Lung Research, Bad Nauheim, 61231, Germany

<sup>2</sup> Dept. Cell Biology & Physiology, 111 Mason Farm Rd, 6312 MBRB CB7545, University of North Carolina at Chapel Hill, Chapel Hill, NC 27599, United States

<sup>3</sup> Department of Pharmacology, Max Planck Institute for Heart and Lung Research, Bad Nauheim, 61231, Germany

<sup>4</sup> Philipps-University Marburg, Faculty of Biology, Cell Signaling and Dynamics, Marburg, 35043, Germany

<sup>5</sup> Research Institute of Pharmaceutical Sciences, College of Pharmacy, Seoul National University, Seoul 08826, Republic of Korea

<sup>6</sup> ECCPS Bioinformatics and Deep Sequencing Platform, Max Planck Institute for Heart and Lung Research, Bad Nauheim, 61231, Germany

\* Correspondence should be addressed to Kathleen M. Caron (email: Kathleen\_caron@med.unc.edu) or Didier Y.R. Stainier (email: [Didier.Stainier@mpi-bn.mpg.de](mailto:Didier.Stainier@mpi-bn.mpg.de))

## Supplemental methods

### Zebrafish genotyping

For RNA seq and qPCR analyses, we used zebrafish embryos and sorted ECs from adult wild-type and *gpr182*<sup>-/-</sup> incrosses, respectively. For WISH and confocal imaging, we used zebrafish embryos from *gpr182* heterozygous incrosses. The embryos were placed individually into PCR tubes with 100 µl of 50 mM NaOH. The samples were incubated by vortexing at 95°C for 20 minutes, then 10 µl of 1M Tris pH 8.0 was added to the solution. The extracted DNA was used for genotyping. The genotyping primers used are listed in Table S1.

### Quantitative PCR

Quantitative PCR (qPCR) was performed using cDNA synthesized from total RNA. Total RNA was extracted using TRIZOL (Life Technologies) from sorted endothelial cells and non-endothelial cells (Figure 1R, S) from 30 hpf genotyped wild-type and *gpr182*<sup>-/-</sup> embryos (Figure 4B). DNase treatment was performed for 30 min at 37°C (Promega) followed by RNA purification with RNA Clean and Concentrator kit (Zymo Research). cDNA was synthesized using SuperScript II RT (Invitrogen) starting from 500 ng of total RNA. Bio-Rad and Thermo Real-Time PCR Systems were used for qPCR experiments. Gene expressions were normalized relative to that of the zebrafish and mouse housekeeping gene  $\beta$ -actin. All reactions were performed in three technical replicates and the results represent three independent biological samples. The qPCR primers used are listed in Table S1.

### Establishing a Stable cell line.

HTLA, an HEK293 cell line stably expressing a tTA-dependent luciferase reporter and a  $\beta$ -arrestin2-TEV fusion gene, was maintained in DMEM supplemented with 10% FBS, 2 µg/ml puromycin and 100 µg/ml hygromycin B in a humidified atmosphere at 37°C in 5% CO<sub>2</sub>. HTLA cells expressing hGPR182-TANGO were established by transfecting cells with pcDNA hGPR182-TANGO using Lipofectamine2000 (Invitrogen) according to manufacturer's instructions. The cells were cultured for 2 weeks in DMEM media containing blasticidin (6 µg/ml). The cells that survived blasticidin selection were used as the cells stably expressing hGPR182-TANGO. Expression of hGPR182-TANGO was confirmed by immunoblot analysis using antiFlag and antiGPR182 antibodies (Sigma-Aldrich).

### Plasmid

GPR182-Tango plasmid was a gift from Bryan Roth (Addgene plasmid # 66341 ; <http://n2t.net/addgene:66341> ; RRID:Addgene\_66341)<sup>1</sup>.

### Cell culture and transfection

Human embryonic kidney 293T (HEK293T) cells were maintained at 37°C in a humidified atmosphere at 5% CO<sub>2</sub> in Dulbecco's modified Eagle's medium (DMEM) (Gibco) supplemented with 10% (v/v) fetal bovine serum (Sigma Aldrich), 10 mM HEPES (Corning), and 750 µL gentamicin (Gibco)

**Table S1**

| Purpose    | Primer name                        | Primer sequence (5' -3')                       | Species   |
|------------|------------------------------------|------------------------------------------------|-----------|
| Genotyping | gpr182 F                           | TTCTTGTTGACAGTGGATGATA                         | zebrafish |
| Genotyping | gpr182 R                           | AGCATTGCACAAGGCTAAACGA                         | zebrafish |
| qPCR       | kdrl F                             | CAATGGCAGGATTCACTTTGAG                         | zebrafish |
| qPCR       | kdrl R                             | GACCGGTGTGGTGCTAAAATG                          | zebrafish |
| qPCR       | fli1rs F                           | CAGACCGAAGGGTCGTACAT                           | zebrafish |
| qPCR       | fli1rs R                           | GACATAGGGGTGGAATGTGG                           | zebrafish |
| qPCR       | gpr182 F                           | GGACTGGCAGAGAACACCAT                           | zebrafish |
| qPCR       | gpr182 R                           | AGCTCACGTTGATGATGCAG                           | zebrafish |
| qPCR       | cmyb F                             | TGATGCTTCCCAACACAGAG                           | zebrafish |
| qPCR       | cmyb R                             | TTCAGAGGGAATCGTCTGCT                           | zebrafish |
| qPCR       | b-actin F                          | TCTGTCCCATGCCAACCAT                            | zebrafish |
| qPCR       | b-actin R                          | TGCCCTCGTGCTGTTTT                              | zebrafish |
| qPCR       | LTA4H F                            | TGATTGCTTTGGTTGTTGGA                           | mouse     |
| qPCR       | LTA4H R                            | GCAGATTTCTCCACCTGCTC                           | mouse     |
| qPCR       | B-ACT F                            | CTGGCACCACACCTTCTACA                           | mouse     |
| qPCR       | B-ACT R                            | CTTTTCACGTTGGCCTTAG                            | mouse     |
| WISH       | <i>gpr182 in situ</i> F (T7)       | TAATACGACTCACTATAGGGA<br>TGACGCATGACATTCACAACT | zebrafish |
| WISH       | <i>gpr182 in situ</i> R (SP6)      | GATTTAGGTGACACTATAGTG<br>CGCCAATGTCAGAGTGACTT  | zebrafish |
| WISH       | <i>cmyb in situ</i> F (T7)         | TAATACGACTCACTATAGGGAT<br>GGCGAGGCGGCACAGACACA | zebrafish |
| WISH       | <i>cmyb in situ</i> R (SP6)        | GATTTAGGTGACACTATAGGC<br>ATCCTTGCTCTAGGGATGGA  | zebrafish |
| Genotyping | Gpr182 wild type F                 | CTGCAGCCTCCTGGCACTAACAGC                       | mouse     |
| Genotyping | Gpr182 wild type R                 | CATTGTCCGGTTC<br>CAAGGTGGAGAC                  | mouse     |
| Genotyping | Gpr182tm2a(KOMP)<br>WtsiTargeted F | GAGATGGCGCA<br>ACGCAATTAAT                     | mouse     |
| Genotyping | Gpr182tm2a(KOMP)<br>WtsiTargeted R | GGGAGGATACCAC<br>AGGGAAATAGAGC                 | mouse     |
| Genotyping | Gpr182 lacZ Targeted F             | TTCACTGGCCGT<br>CGTTTTACAACGT                  | mouse     |
| Genotyping | Gpr182 lacZ Targeted R             | ATGTGAGCGAGTAAC<br>AACCCGTCGGATTCT             | mouse     |

**Table S1: Primers used for qPCR, genotyping and WISH probe synthesis.**

**Table S2**

| gene          | set | Ct (mean) |         |
|---------------|-----|-----------|---------|
|               |     | ECs       | Non-ECs |
| <i>ef1a</i>   | 1st | 22.187    | 22.573  |
|               | 2nd | 22.184    | 22.469  |
|               | 3rd | 22.256    | 22.469  |
|               | 4th | 23.169    | 23.329  |
|               | 5th | 23.258    | 23.130  |
|               | 6th | 23.140    | 23.072  |
| <i>kdrl</i>   | 1st | 27.994    | 33.714  |
|               | 2nd | 28.021    | 33.256  |
|               | 3rd | 27.963    | 33.665  |
|               | 4th | 29.026    | 33.956  |
|               | 5th | 28.905    | 34.279  |
|               | 6th | 28.719    | 34.174  |
| <i>fli1rs</i> | 1st | 29.387    | 35.884  |
|               | 2nd | 29.298    | 37.083  |
|               | 3rd | 29.443    | 35.369  |
|               | 4th | 31.015    | 38.329  |
|               | 5th | 30.901    | 34.707  |
|               | 6th | 30.601    | 38.849  |
| <i>gpr182</i> | 1st | 27.373    | 32.658  |
|               | 2nd | 27.388    | 32.976  |
|               | 3rd | 27.683    | 32.364  |
|               | 4th | 28.188    | 32.679  |
|               | 5th | 28.023    | 32.793  |
|               | 6th | 28.205    | 32.577  |

**Table S2. Cycle threshold (Ct) values of candidate genes obtained via qPCR.**

The cycle threshold (Ct) values were determined by qPCR analysis of *kdrl*, *fli1rs* and *gpr182* mRNA expression levels in isolated ECs and non ECs from 30 hpf wild-type *TgBAC(etsrp:EGFP)* zebrafish embryos. N = 6 biologically independent samples.

**Table S3**

| Gene ID                    | Gene name   |         | ECs at 30 hpf |        |         |         | Whole embryos at 30 hpf |        |        |        | Whole embryos at 48 hpf |        |        |        |
|----------------------------|-------------|---------|---------------|--------|---------|---------|-------------------------|--------|--------|--------|-------------------------|--------|--------|--------|
|                            |             |         | WT1           | WT2    | Mut1    | Mut2    | WT1                     | WT2    | Mut1   | Mut2   | WT1                     | WT2    | Mut1   | Mut2   |
| ENSDAR<br>G000000<br>90783 | mfap4       | RPKM    | 7.906         | 2.139  | 24.764  | 16.804  | 1.410                   | 1.139  | 0.729  | 0.887  | 0.406                   | 0.243  | 1.236  | 1.065  |
|                            |             | Z-score | -0.502        | -1.082 | 1.193   | 0.392   | 1.236                   | 0.328  | -1.048 | -0.516 | -0.681                  | -1.016 | 1.025  | 0.673  |
| ENSDAR<br>G000000<br>67797 | spi1a       | RPKM    | 1.289         | 0.753  | 15.183  | 18.656  | 0.459                   | 0.450  | 0.896  | 0.609  | 0.571                   | 0.528  | 0.829  | 0.783  |
|                            |             | Z-score | -0.827        | -0.885 | 0.669   | 1.043   | -0.694                  | -0.736 | 1.406  | 0.025  | -0.711                  | -0.996 | 1.007  | 0.699  |
| ENSDAR<br>G000000<br>00767 | spi1b       | RPKM    | 11.418        | 12.123 | 26.243  | 28.393  | 2.312                   | 3.138  | 2.672  | 2.849  | 1.508                   | 2.066  | 2.336  | 2.245  |
|                            |             | Z-score | -0.901        | -0.822 | 0.742   | 0.981   | -1.246                  | 1.145  | -0.205 | 0.307  | -1.430                  | 0.073  | 0.800  | 0.557  |
| ENSDAR<br>G000000<br>56407 | irf8        | RPKM    | 0.834         | 0.835  | 6.503   | 12.357  | 0.270                   | 0.265  | 0.369  | 0.263  | 0.211                   | 0.263  | 0.322  | 0.426  |
|                            |             | Z-score | -0.780        | -0.780 | 0.249   | 1.312   | -0.419                  | -0.517 | 1.497  | -0.561 | -1.022                  | -0.461 | 0.175  | 1.308  |
| ENSDAR<br>G000000<br>55290 | mpeg<br>1.1 | RPKM    | 0.840         | 0.934  | 9.389   | 7.337   | 0.435                   | 0.426  | 0.248  | 0.387  | 0.354                   | 0.706  | 0.935  | 0.894  |
|                            |             | Z-score | -0.861        | -0.839 | 1.084   | 0.617   | 0.698                   | 0.604  | -1.457 | 0.155  | -1.389                  | -0.062 | 0.804  | 0.648  |
| ENSDAR<br>G000000<br>54610 | coro1a      | RPKM    | 14.909        | 8.546  | 68.067  | 82.228  | 2.841                   | 3.923  | 2.877  | 3.070  | 2.985                   | 2.923  | 4.234  | 3.273  |
|                            |             | Z-score | -0.768        | -0.939 | 0.663   | 1.044   | -0.665                  | 1.470  | -0.593 | -0.212 | -0.608                  | -0.711 | 1.452  | -0.133 |
| ENSDAR<br>G000000<br>41041 | cxcr3.2     | RPKM    | 1.558         | 3.378  | 12.405  | 15.247  | 0.202                   | 0.297  | 0.148  | 0.147  | 0.049                   | 0.098  | 0.200  | 0.299  |
|                            |             | Z-score | -0.983        | -0.712 | 0.635   | 1.060   | 0.048                   | 1.398  | -0.718 | -0.727 | -1.013                  | -0.571 | 0.349  | 1.235  |
| ENSDAR<br>G000001<br>02986 | csf1ra      | RPKM    | 1.267         | 0.267  | 4.542   | 4.018   | 2.226                   | 2.057  | 1.087  | 0.982  | 2.583                   | 2.800  | 3.009  | 2.940  |
|                            |             | Z-score | -0.604        | -1.085 | 0.970   | 0.719   | 0.990                   | 0.728  | -0.778 | -0.941 | -1.331                  | -0.173 | 0.936  | 0.568  |
| ENSDAR<br>G000000<br>53624 | csf1rb      | RPKM    | 0.679         | 2.380  | 2.331   | 5.290   | 0.725                   | 0.776  | 0.483  | 0.609  | 0.838                   | 0.996  | 0.950  | 0.976  |
|                            |             | Z-score | -1.038        | -0.151 | -0.177  | 1.367   | 0.588                   | 0.979  | -1.267 | -0.300 | -1.445                  | 0.792  | 0.136  | 0.517  |
| ENSDAR<br>G000000<br>23188 | lcp1        | RPKM    | 49.942        | 37.705 | 201.117 | 220.084 | 0.501                   | 0.574  | 0.449  | 0.528  | 0.490                   | 0.529  | 0.623  | 0.536  |
|                            |             | Z-score | -0.799        | -0.925 | 0.764   | 0.960   | -0.224                  | 1.163  | -1.230 | 0.291  | -0.974                  | -0.275 | 1.398  | -0.149 |
| ENSDAR<br>G000000<br>45959 | csf3r       | RPKM    | 7.316         | 10.160 | 31.517  | 29.889  | 0.674                   | 0.453  | 0.763  | 0.483  | 0.590                   | 0.381  | 0.529  | 0.456  |
|                            |             | Z-score | -0.973        | -0.750 | 0.925   | 0.797   | 0.543                   | -0.940 | 1.132  | -0.735 | 1.117                   | -1.193 | 0.442  | -0.365 |
| ENSDAR<br>G000000<br>19521 | mpx         | RPKM    | 12.110        | 7.207  | 7.653   | 13.438  | 3.532                   | 2.393  | 1.265  | 1.335  | 5.269                   | 5.275  | 6.639  | 6.549  |
|                            |             | Z-score | 0.640         | -0.923 | -0.780  | 1.063   | 1.313                   | 0.246  | -0.812 | -0.747 | -0.869                  | -0.861 | 0.924  | 0.806  |
| ENSDAR<br>G000000<br>87646 | runx1       | RPKM    | 7.084         | 8.420  | 10.240  | 10.175  | 0.043                   | 0.169  | 0.042  | 0.042  | 0.168                   | 0.209  | 0.171  | 0.212  |
|                            |             | Z-score | -1.248        | -0.369 | 0.830   | 0.787   | -0.488                  | 1.500  | -0.504 | -0.507 | -0.919                  | 0.806  | -0.809 | 0.922  |
| ENSDAR<br>G000000<br>09094 | gata2b      | RPKM    | 0.503         | 0.377  | 0.639   | 0.770   | 0.195                   | 0.144  | 0.000  | 0.142  | 0.191                   | 0.333  | 0.194  | 0.241  |
|                            |             | Z-score | -0.410        | -1.148 | 0.392   | 1.166   | 0.893                   | 0.278  | -1.434 | 0.263  | -0.736                  | 1.407  | -0.691 | 0.019  |
| ENSDAR<br>G000000<br>53666 | myb         | RPKM    | 18.520        | 19.649 | 22.368  | 19.521  | 6.557                   | 7.251  | 6.964  | 6.405  | 5.541                   | 5.297  | 6.343  | 5.367  |
|                            |             | Z-score | -0.907        | -0.222 | 1.428   | -0.299  | -0.617                  | 1.185  | 0.441  | -1.010 | -0.199                  | -0.706 | 1.465  | -0.560 |
| ENSDAR<br>G000000<br>10317 | gpr183a     | RPKM    | 0.849         | 2.548  | 9.834   | 5.373   | 0.198                   | 0.259  | 0.129  | 0.384  | 0.193                   | 0.257  | 0.262  | 0.260  |
|                            |             | Z-score | -0.968        | -0.536 | 1.320   | 0.184   | -0.411                  | 0.149  | -1.047 | 1.309  | -1.497                  | 0.415  | 0.565  | 0.517  |

**Table S3. Expression levels of myeloid and HE/HSC markers from the RNA seq data sets.** z-score of reads per kilobase per million reads (RPKM) of each gene in ECs isolated from 30 hpf wild-type and *gpr182*<sup>-/-</sup> embryos, and in whole embryos (30 and 48 hpf wild-type and *gpr182*<sup>-/-</sup>).

**Table S4**

| Mouse NO | Genotype  | WBC (K/uL) | NEUT# (K/uL) | NEUT % (%) | LYMPH # (K/uL) | LYMPH % (%) | MONO # (K/uL) | MONO % (%) | EO # (K/uL) | EO % (%) | BASO # (K/uL) |
|----------|-----------|------------|--------------|------------|----------------|-------------|---------------|------------|-------------|----------|---------------|
| WT1      | wild type | 6.68       | 1.99         | 29.8       | 4.33           | 64.8        | 0.14          | 2.1        | 0.16        | 2.4      | 0.06          |
| WT2      | wild type | 6.28       | 1.23         | 19.5       | 4.74           | 75.5        | 0.15          | 2.4        | 0.15        | 2.4      | 0.01          |
| WT3      | wild type | 5.1        | 1.57         | 30.8       | 3.32           | 65.1        | 0.05          | 1          | 0.16        | 3.1      | 0             |
| WT4      | wild type | 3.53       | 0.41         | 11.6       | 3              | 85          | 0.04          | 1.1        | 0.08        | 2.3      | 0             |
| WT5      | wild type | 5.07       | 0.71         | 14         | 4.19           | 82.6        | 0.07          | 1.4        | 0.1         | 2        | 0             |
| WT6      | wild type | 3.87       | 0.47         | 12.1       | 3.2            | 82.7        | 0.05          | 1.3        | 0.14        | 3.6      | 0.01          |
| WT7      | wild type | 3.69       | 0.53         | 14.3       | 2.98           | 80.8        | 0.04          | 1.1        | 0.12        | 3.3      | 0.02          |
| WT8      | wild type | 5.29       | 0.87         | 16.5       | 4.2            | 79.4        | 0.06          | 1.1        | 0.15        | 2.8      | 0.01          |
| NO.573   | GPR182 KO | 10.2       | 1.33         | 13         | 8.38           | 82.2        | 0.22          | 2.2        | 0.26        | 2.5      | 0.01          |
| NO.600   | GPR182 KO | 14.46      | 7.91         | 54.7       | 5.47           | 37.8        | 0.24          | 1.7        | 0.82        | 5.7      | 0.02          |
| NO.593   | GPR182 KO | 5.57       | 1.84         | 33         | 3.37           | 60.5        | 0.08          | 1.4        | 0.26        | 4.7      | 0.02          |
| NO.634   | GPR182 KO | 6.25       | 1.92         | 30.7       | 3.64           | 58.2        | 0.33          | 5.3        | 0.36        | 5.8      | 0             |
| NO.641   | GPR182 KO | 4.06       | 1.09         | 26.9       | 2.7            | 66.5        | 0.05          | 1.2        | 0.21        | 5.2      | 0.01          |
| NO.653   | GPR182 KO | 6.95       | 3.18         | 45.8       | 3.49           | 50.2        | 0.08          | 1.2        | 0.19        | 2.7      | 0.01          |
| NO.656   | GPR182 KO | 5.45       | 1.3          | 23.8       | 3.94           | 72.3        | 0.08          | 1.5        | 0.13        | 2.4      | 0             |

  

| Mouse NO | BASO % (%) | RBC (M/uL) | HGB (g/dL) | RET# (K/uL) | RET% (%) | PLT (K/uL) | PDW (fL) | MPV (fL) | P-LCR (%) | PCT (%) |
|----------|------------|------------|------------|-------------|----------|------------|----------|----------|-----------|---------|
| WT1      | 0.9        | 9.1        | 13.5       | 581.5       | 6.39     | 1500       | 8.5      | 8.4      | 10        | 1.26    |
| WT2      | 0.2        | 10.17      | 14.8       | 616.3       | 6.06     | 1227       | 8.5      | 8.8      | 9         | 1.08    |
| WT3      | 0          | 10.21      | 14.8       | 528.9       | 5.18     | 1514       | 7.4      | 8.6      | 4.2       | 1.3     |
| WT4      | 0          | 9.83       | 14.8       | 505.3       | 5.14     | 1185       | 7.4      | 8.5      | 6.4       | 1.01    |
| WT5      | 0          | 10.18      | 15.4       | 504.9       | 4.96     | 807        | 8        | 8.6      | 10.6      | 0.69    |
| WT6      | 0.3        | 10.57      | 16         | 449.2       | 4.25     | 357        | 7.9      | 8.4      | 9.6       | 0.3     |
| WT7      | 0.5        | 8.33       | 13.7       | 333.2       | 4        | 324        | 7.8      | 8.7      | 7         | 0.28    |
| WT8      | 0.2        | 9.94       | 15.3       | 464.2       | 4.67     | 446        | 8.3      | 8.6      | 4.9       | 0.38    |
| NO.573   | 0.1        | 8.99       | 13.5       | 766.8       | 8.53     | 1111       | 7.8      | 8.3      | 8.4       | 0.92    |
| NO.600   | 0.1        | 9.57       | 14.9       | 1950.4      | 20.38    | 207        | ---      | 10.4     | ---       | 0.22    |
| NO.593   | 0.4        | 10.16      | 15.5       | 809.8       | 7.97     | 1232       | 8        | 8.1      | 8.1       | 1       |
| NO.634   | 0          | 9.95       | 14.9       | 690.5       | 6.94     | 757        | 8.6      | 8.5      | 6         | 0.64    |
| NO.641   | 0.2        | 9.73       | 15         | 510.8       | 5.25     | 921        | 7.6      | 8        | 5.5       | 0.74    |
| NO.653   | 0.1        | 10.88      | 16.4       | 478.7       | 4.4      | 1141       | 8.2      | 8.1      | 6.9       | 0.92    |
| NO.656   | 0          | 10.33      | 15.8       | 477.2       | 4.62     | 676        | 8.2      | 8        | 8.4       | 0.54    |

**Table S4. Results of complete blood count test.**

BASO, basophils; EO, eosinophils; HGB, hemoglobin; LYMPH, lymphocytes; MONO, monocytes; MPV, mean volume platelet; NEUT, neutrophils; PLT, platelets; PCT, Procalcitonin; PDW, PLT distribution width; P-LCR, Platelet Large Cell Ratio; RBC, red blood cells; RET, Reticulocytes; WBC, white blood cells.

**A**

| Gene ID           | Gene Name     |         | Endothelial cell |        |         | Hemogenic endothelium |         |         | Hematopoietic stem cells |         |         | length |
|-------------------|---------------|---------|------------------|--------|---------|-----------------------|---------|---------|--------------------------|---------|---------|--------|
|                   |               |         | EC1              | EC2    | EC3     | HE1                   | HE2     | HE3     | HSC1                     | HSC2    | HSC3    |        |
| ENSDARG0000036616 | <i>gpr182</i> | RPKM    | 70.821           | 57.606 | 68.995  | 86.482                | 104.135 | 98.239  | 0.109                    | 0.000   | 0.083   | 1481   |
|                   |               | z-score | 0.390            | 0.083  | 0.348   | 0.755                 | 1.165   | 1.028   | -1.255                   | -1.258  | -1.256  |        |
| ENSDARG0000053666 | <i>cmyb</i>   | RPKM    | 1049.605         | 2.575  | 729.997 | 1334.445              | 983.276 | 677.882 | 526.544                  | 463.916 | 609.411 | 3317   |
|                   |               | z-score | 0.390            | -1.834 | 0.055   | 1.625                 | 0.713   | -0.080  | -0.473                   | -0.636  | -0.258  |        |
| ENSDARG0000009094 | <i>gata2b</i> | RPKM    | 2.578            | 4.600  | 0.075   | 2.904                 | 4.027   | 8.738   | 0.083                    | 0.062   | 0.000   | 1955   |
|                   |               | z-score | 0.390            | 0.690  | -0.843  | 0.116                 | 0.496   | 2.092   | -0.840                   | -0.847  | -0.868  |        |
| ENSDARG0000040080 | <i>fli1a</i>  | RPKM    | 60.538           | 48.221 | 68.205  | 81.536                | 83.624  | 86.629  | 1.986                    | 0.150   | 1.506   | 2914   |
|                   |               | z-score | 0.390            | 0.005  | 0.543   | 0.902                 | 0.959   | 1.040   | -1.241                   | -1.290  | -1.254  |        |
| ENSDARG0000054632 | <i>fli1rs</i> | RPKM    | 37.490           | 42.606 | 34.489  | 75.431                | 65.151  | 84.870  | 1.480                    | 0.764   | 1.485   | 3203   |
|                   |               | z-score | 0.390            | 0.136  | -0.114  | 1.148                 | 0.831   | 1.439   | -1.132                   | -1.154  | -1.131  |        |

Zhang *et al.* (2015)

**B**

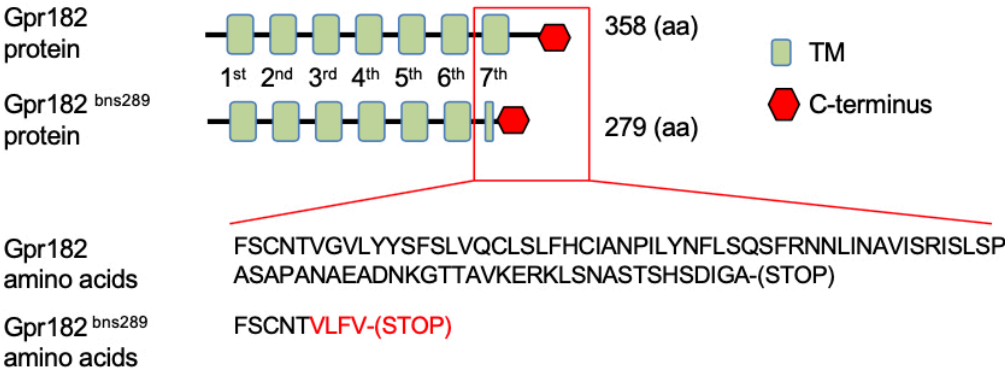

**C**

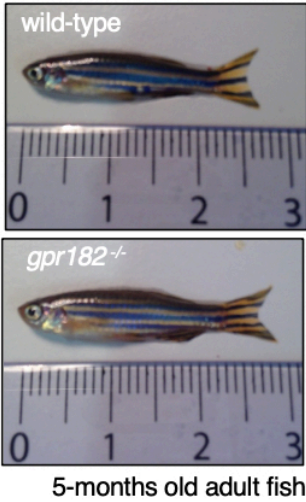

**D**

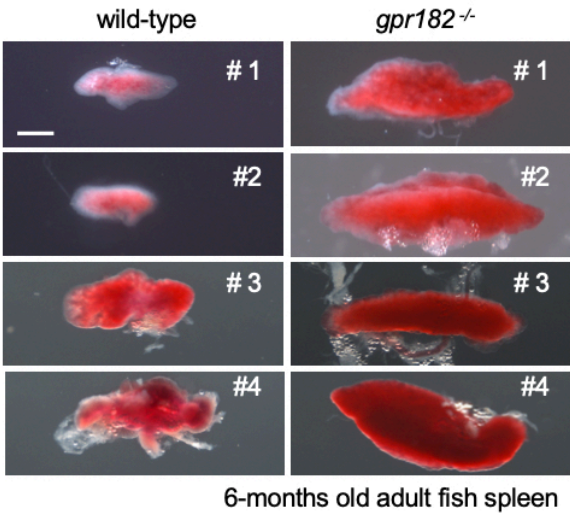



**Figure S1. Adult *gpr182* mutant zebrafish present with bigger spleens than wild-type.**

(A) Table showing mRNA levels of *gpr182* as well as EC, HE and HSC marker genes from the RNA seq dataset. RNA seq dataset consists of mRNA isolated from non-hemogenic ECs (ECs, *kdr1*<sup>+</sup>/*runx1*<sup>-</sup>), specified HE (HE, *kdr1*<sup>+</sup>/*runx1*<sup>+</sup>), and HSCs (HSC, *kdr1*<sup>-</sup>/*runx1*<sup>+</sup>) from 28 hpf *Tg(kdr1:mCherry); Tg(runx1:EGFP)* embryos<sup>2</sup>. (B) Gpr182 and Gpr182<sup>bns289</sup> proteins. The *bns289* mutation causes a premature stop codon at amino acid 279, resulting in the loss of the 7th putative trans membrane domain (TM) and the intracellular domain. (C) Brightfield images of 5-months old wild-type and *gpr182*<sup>-/-</sup> zebrafish. (D) Brightfield images of 6-months old wild-type and *gpr182*<sup>-/-</sup> zebrafish spleen. Scale bar: 1 mm (D). RPKMs, reads per kilobase per million reads; HE, hemogenic endothelium; HSC, hematopoietic stem cell.

**A**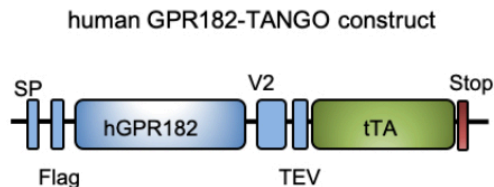**B**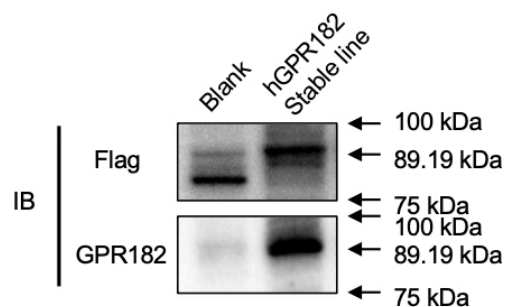**C**

| No | Name (function)                                                |
|----|----------------------------------------------------------------|
| 1  | MS-275 (A HDAC1, HDAC3 inhibitor)                              |
| 2  | Ibuprofen (Cyclooxygenase (COX) inhibitor)                     |
| 3  | Butaprost (an EP2 selective agonist)                           |
| 4  | JP83<br>(an irreversible fatty acyl amide hydrolase inhibitor) |
| 5  | 5,8,11-Eicosatriynoic Acid                                     |
| 6  | 8-iso Prostaglandin E2 isopropyl ester                         |
| 7  | 9-keto Fluprostenol isopropyl ester                            |
| 8  | 5(Z),11(Z),14(Z)-Eicosatrienoic Acid                           |
| 9  | Tibolone                                                       |
| 10 | alpha.-Linolenoyl Ethanolamide                                 |
| 11 | 13,14-dihydro-15-keto Prostaglandin F2.alpha. isopropyl ester  |

**D**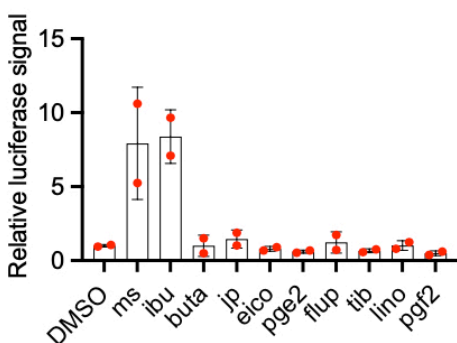**E**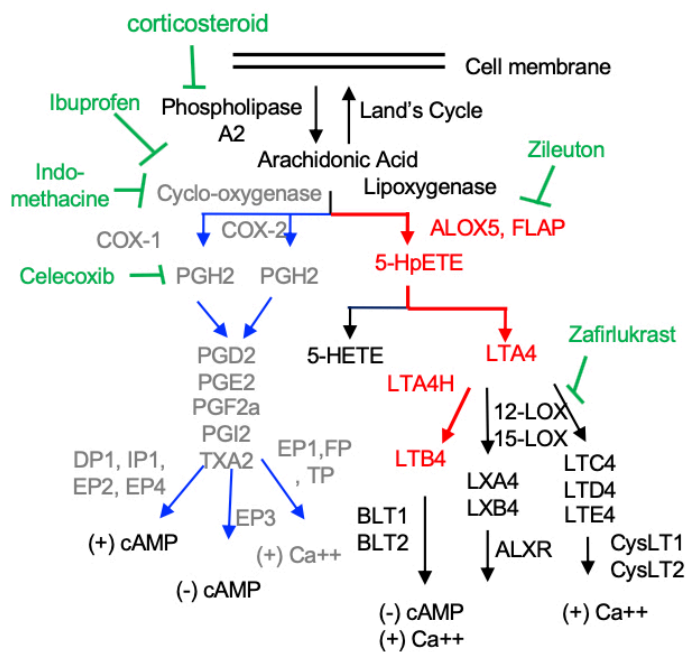

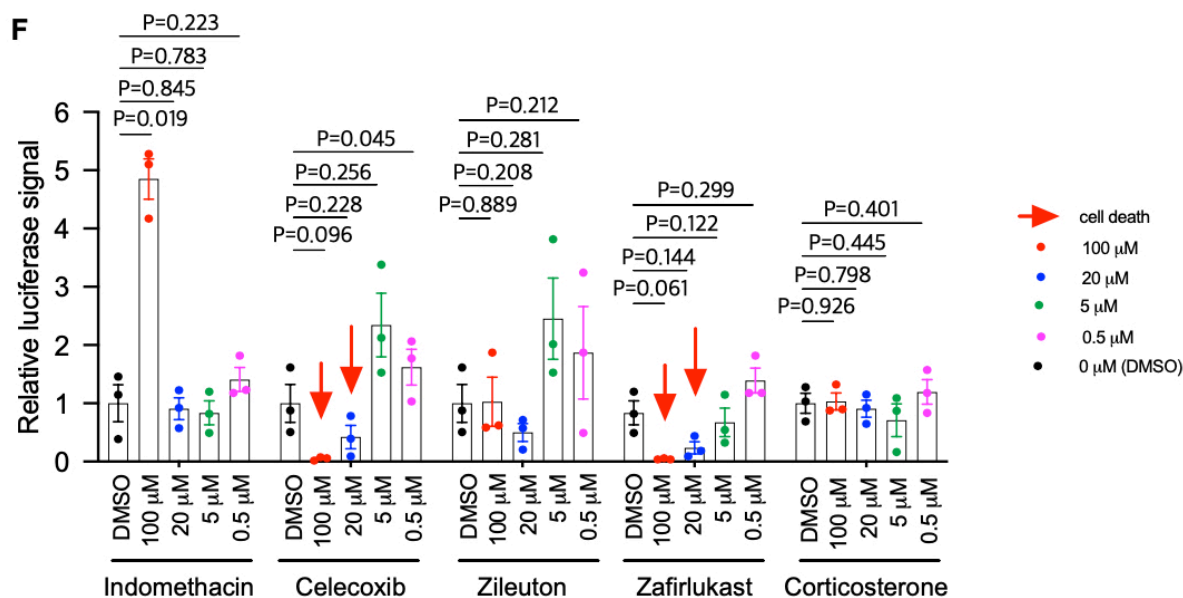

**Figure S2. Leukotriene signaling induces the activation of GPR182-TANGO assay.**

(A) Schematic showing human GPR182-TANGO (hGPR182-TANGO) construct. (B) Western blots for hGPR182 expression in cells stably expressing the hGPR182-TANGO construct. (C) Table showing 11 potential hit compounds selected from primary small molecule screening. (D) Retesting of 11 initial hit compounds using hGPR182-TANGO. Assay run in duplicate. Negative control (1% DMSO). (E) Schematic illustration of prostaglandin and leukotriene biosynthesis pathways. Pathways blocked by Ibuprofen marked in blue; pathways upregulated in *gpr182*<sup>-/-</sup> zebrafish ECs marked in red. (F) Testing hGPR182-TANGO activation by treatment with inhibitors blocking prostaglandin and leukotriene biosynthesis pathways. Negative control (1% DMSO). N = 3 biologically independent samples. DMSO treated samples were set at 1. Data are mean  $\pm$  s.d., and a two-tailed Student's t-test was used to calculate P values. Red arrows indicate cell death in the inhibitor treated condition. tTA, tetracycline transactivator; SP, signal peptide; TEV, Tobacco Etch Virus nuclear inclusion an endopeptidase.

**A**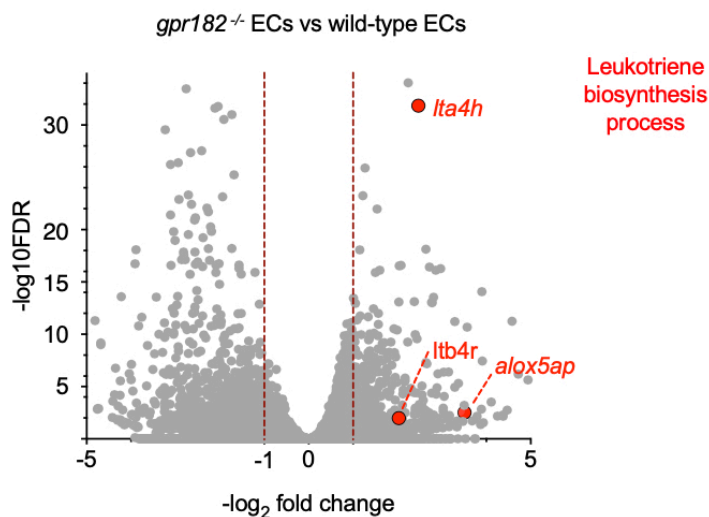**B**

| Ensembl gene id    | Ensembl gene name | fold change HE vs EC (Zhang) | logCPM | P Value  | FDR      | fold change ( <i>gpr182</i> <sup>-/-</sup> vs wild-type) |
|--------------------|-------------------|------------------------------|--------|----------|----------|----------------------------------------------------------|
| ENSDARG00000054755 | <i>alox5ap</i>    | 6.035                        | 3.800  | 1.18E-10 | 3.89E-09 | 3.512                                                    |
| ENSDARG00000006029 | <i>lta4h</i>      | 2.612                        | 8.384  | 2.07E-29 | 2.03E-27 | 2.474                                                    |
| ENSDARG00000032631 | <i>ltb4r</i>      | 6.985                        | 5.879  | 8.07E-11 | 2.71E-09 | 2.032                                                    |

**Figure S3. Transcriptomic analysis supports the hypothesis that *gpr182* mutant zebrafish ECs upregulate leukotriene signaling pathway genes compared to wild-type ECs.**

(A) Volcano plot showing the relative mRNA expression in the transcriptomic analysis of 30 hpf *gpr182*<sup>-/-</sup> ECs compared to wild-type ECs. Genes involved in the leukotriene biosynthesis pathway are marked in red. (B) Table showing the z-score of reads per kilobase per million reads (RPKMs) of each gene in ECs from 30 hpf wild-type and *gpr182*<sup>-/-</sup> embryos. RPKMs, reads per kilobase per million reads.

## Reference

- (1) Kroeze, W. K.; Sassano, M. F.; Huang, X.-P.; Lansu, K.; McCorvy, J. D.; Giguère, P. M.; Sciaky, N.; Roth, B. L. PRESTO-Tango as an Open-Source Resource for Interrogation of the Druggable Human GPCRome. *Nature Structural and Molecular Biology* **2015**, 22 (5), nsmb.3014. <https://doi.org/10.1038/nsmb.3014>.
- (2) Zhang, P.; He, Q.; Chen, D.; Liu, W.; Wang, L.; Zhang, C.; Ma, D.; Li, W.; Liu, B.; Liu, F. G Protein-Coupled Receptor 183 Facilitates Endothelial-to-Hematopoietic Transition via Notch1 Inhibition. *Cell research* **2015**, 25 (10), 1093–1107. <https://doi.org/10.1038/cr.2015.109>.
